# Supplementary material for: Life Cycle Assessment of Rare Earth Elements-Free Permanent Magnet Alternatives: Sintered Ferrite and Mn–Al–C
Source: PubMed Central journal article supplement (PMC10498492; doi:10.1021/acssuschemeng.3c02984), 2023-08-29
Supplement: sc3c02984_si_001.pdf [file sc3c02984_si_001.pdf]

## Supporting information

# Life cycle assessment of rare earth elements-free permanent magnet alternatives: sintered ferrite and Mn-Al-C

Alessia Amato <sup>1\*</sup>, Alessandro Becci <sup>1\*</sup>, Alberto Bollero <sup>2</sup>, Maria del Mar Cerrillo-Gonzalez <sup>3</sup>, Santiago Cuesta-Lopez <sup>4</sup>, Semih Ener <sup>6</sup>, Imants Dirba <sup>6</sup>, Oliver Gutfleisch <sup>6</sup>, Valentina Innocenzi <sup>7</sup>, Myriam Montes <sup>4</sup>, Konstantinos Sakkas <sup>5</sup>, Irina Sokolova <sup>4</sup>, Francesco Vegliò <sup>7</sup>, Maria Villen-Guzman <sup>3</sup>, Eva Vicente-Barragan <sup>4</sup>, Iakovos Yakoumis <sup>5</sup>, Francesca Beolchini <sup>1</sup>

<sup>1</sup>Department of Life and Environmental Sciences, Università Politecnica delle Marche, Ancona, 60131, Italy

<sup>2</sup>Group of Permanent Magnets and Applications, IMDEA Nanoscience, Madrid, 28049, Spain

<sup>3</sup>Department of Chemical Engineering, Faculty of Sciences, Universidad de Málaga, 29071, Malaga, Spain

<sup>4</sup>Fundación ICAMCYL, International Center for Advanced Materials and Raw Materials of Castilla y León, León, Spain

<sup>5</sup>MNLT Innovations PC, Kifisias Ave. 125-127, 11524, Athens, Greece

<sup>6</sup>Department Functional Materials, Material Science Faculty, Technical University of Darmstadt, 64287 Darmstadt, Germany

<sup>7</sup>SmartWaste Engineering S.r.l. Piazzale Monteluco di Roio, 67100 L'Aquila, Italy

\*Corresponding authors:

Alessia Amato, [a.amato@univpm.it](mailto:a.amato@univpm.it), +39 0712204225

Alessandro Becci, [a.becci@univpm.it](mailto:a.becci@univpm.it), +39 0712204225

Number of pages: 10

Number of tables: 2

Number of figures: 3

Table S1: Energy and mass balance of the two sintering routes (based on the production of 100 kg of final permanent magnet. \*The quantity of dispersants, lower than 1% of the whole input, make them negligible for the analysis purpose).

| Process                   | Step                    | Input                                                                                                                                               | Output                                                                                                                                           |
|---------------------------|-------------------------|-----------------------------------------------------------------------------------------------------------------------------------------------------|--------------------------------------------------------------------------------------------------------------------------------------------------|
| Ferrite thermal sintering | Mixing                  | 0.5 kWh<br>13.3 kg SrCO <sub>3</sub><br>89.0 kg Fe <sub>2</sub> O <sub>3</sub><br>0.09 kg SiO <sub>2</sub><br>0.2 kg H <sub>3</sub> BO <sub>3</sub> | 102.6 kg mixed powder                                                                                                                            |
|                           | Pelletizing             | 8.4 kWh                                                                                                                                             | 107 kg ball pellet (diameter 6 mm)                                                                                                               |
|                           | Pre-sintering           | 195 kWh                                                                                                                                             | 96.2 kg SrFe <sub>12</sub> O <sub>19</sub> -SiO <sub>2</sub><br>2.4 kg Fe <sub>2</sub> O <sub>3</sub><br>4.0 kg CO <sub>2</sub>                  |
|                           | Dry crushing            | 44 kWh                                                                                                                                              | Pre-sintered powder (<10 μm)                                                                                                                     |
|                           | Wet crushing            | 33 kWh<br>95.9 kg water<br>1.0 kg CaCO <sub>3</sub><br>0.1 kg SiO <sub>2</sub><br>0.3 kg dispersants*<br>0.1 kg H <sub>3</sub> BO <sub>3</sub>      | 195.9 kg slurry                                                                                                                                  |
|                           | Dehydration             | 18.5 kWh                                                                                                                                            | 133.3 kg slurry (75 wt.% solid)<br>62.6 kg water                                                                                                 |
|                           | Moulding                | 55 kWh                                                                                                                                              | 1400 unit of compact magnet<br>(Diameter 5 cm; heigh 1 cm; ρ: 3.8 g cm <sup>-3</sup> )                                                           |
|                           | Drying                  | 96 kWh                                                                                                                                              | 1400 unit (=100 kg solid)<br>33.3 kg water                                                                                                       |
|                           | Sintering               | 250 kWh                                                                                                                                             | 1400 units synthetized ferrite magnet                                                                                                            |
|                           | Magnetization           | 350 kWh                                                                                                                                             | 1400 units ferrite PM (=100 kg)<br><i>B<sub>r</sub></i> 0.43 T; <i>H<sub>c</sub></i> 310 kA/m; ( <i>BH</i> ) <sub>max</sub> 35 kJ/m <sup>3</sup> |
| Mn-Al-C sintering route   | Mixing                  | 0.5 kWh<br>72 kg Mn<br>29.5 kg Al<br>0.5 kg C                                                                                                       | 102 kg mixed powder<br>(72 kg Mn, 29.50 kg Al; 0.5 kg C)                                                                                         |
|                           | Melting and casting     | 215 kWh                                                                                                                                             | 100 kg molten solution casting in cylinders<br>(70 wt% Mn; 29.5 wt% Al; 0.5 wt% C)<br>2 kg Mn                                                    |
|                           | Homogenizing            | 94 kWh                                                                                                                                              | 100 kg ε-phase Mn-Al-C (Mn <sub>53</sub> Al <sub>45</sub> C <sub>2</sub> )                                                                       |
|                           | Quenching and Tempering | 18 kWh                                                                                                                                              | 100 kg τ-phase Mn-Al-C<br>(D: 4 cm; H: 3 cm; ρ: 5.1 g cm <sup>-3</sup> )<br>(Equivalent to 520 billets)                                          |
|                           | Hot-extrusion           | 84 kWh                                                                                                                                              | 100 kg τ-phase Mn-Al-C<br>(D: 1.5 cm; H: 22 cm)                                                                                                  |

|                  |        |                                                                                                                                                       |
|------------------|--------|-------------------------------------------------------------------------------------------------------------------------------------------------------|
| Cutting          | -      | 100 kg $\tau$ -phase Mn-Al-C<br>(D: 1.5cm; 2 cm)<br>Equivalent to 5720 units                                                                          |
| Compression work | 19 kWh | 100 kg $\tau$ -phase Mn-Al-C<br>(D: 1.5; H: 1.6 cm)<br>5720 units Mn-Al-C magnet<br>$B_r$ 0.47 T; $H_c$ 238.7 kA/m; $(BH)_{max}$ 35 kJ/m <sup>3</sup> |

Table S2: Characteristics of machine selected for the processes.

| Process                   | Step                    | Capacity     | Reference |
|---------------------------|-------------------------|--------------|-----------|
| Ferrite thermal sintering | Mixing                  | 100L/batch   | 1         |
|                           | Pelletizing             | 100 kg/h     | 2         |
|                           | Pre-sintering           | 120 kg/h     | 3         |
|                           | Dry crushing            | 200 kg/h     | 4         |
|                           | Wet crushing            | 200 kg/h     | 4         |
|                           | Dehydration             | 200 kg/h     | 5         |
|                           | Moulding                | 100 kg/h     | 6         |
|                           | Drying                  | 270 kg/h     | 7         |
|                           | Sintering               | (2.5 kWh/kg) | 8         |
|                           | Magnetization           | -            | 8,9       |
| Mn-Al-C sintering route   | Mixing                  | 100L/batch   | 1         |
|                           | Melting and casting     | 100 kg/h     | 10        |
|                           | Homogenizing            | 400 L        | 11        |
|                           | Quenching and Tempering | 120 kg       | 11        |
|                           | Hot-extrusion           | -            | 12        |
|                           | Cutting                 | -            |           |
|                           | Compression work        | -            | 13        |

## Environmental conservation

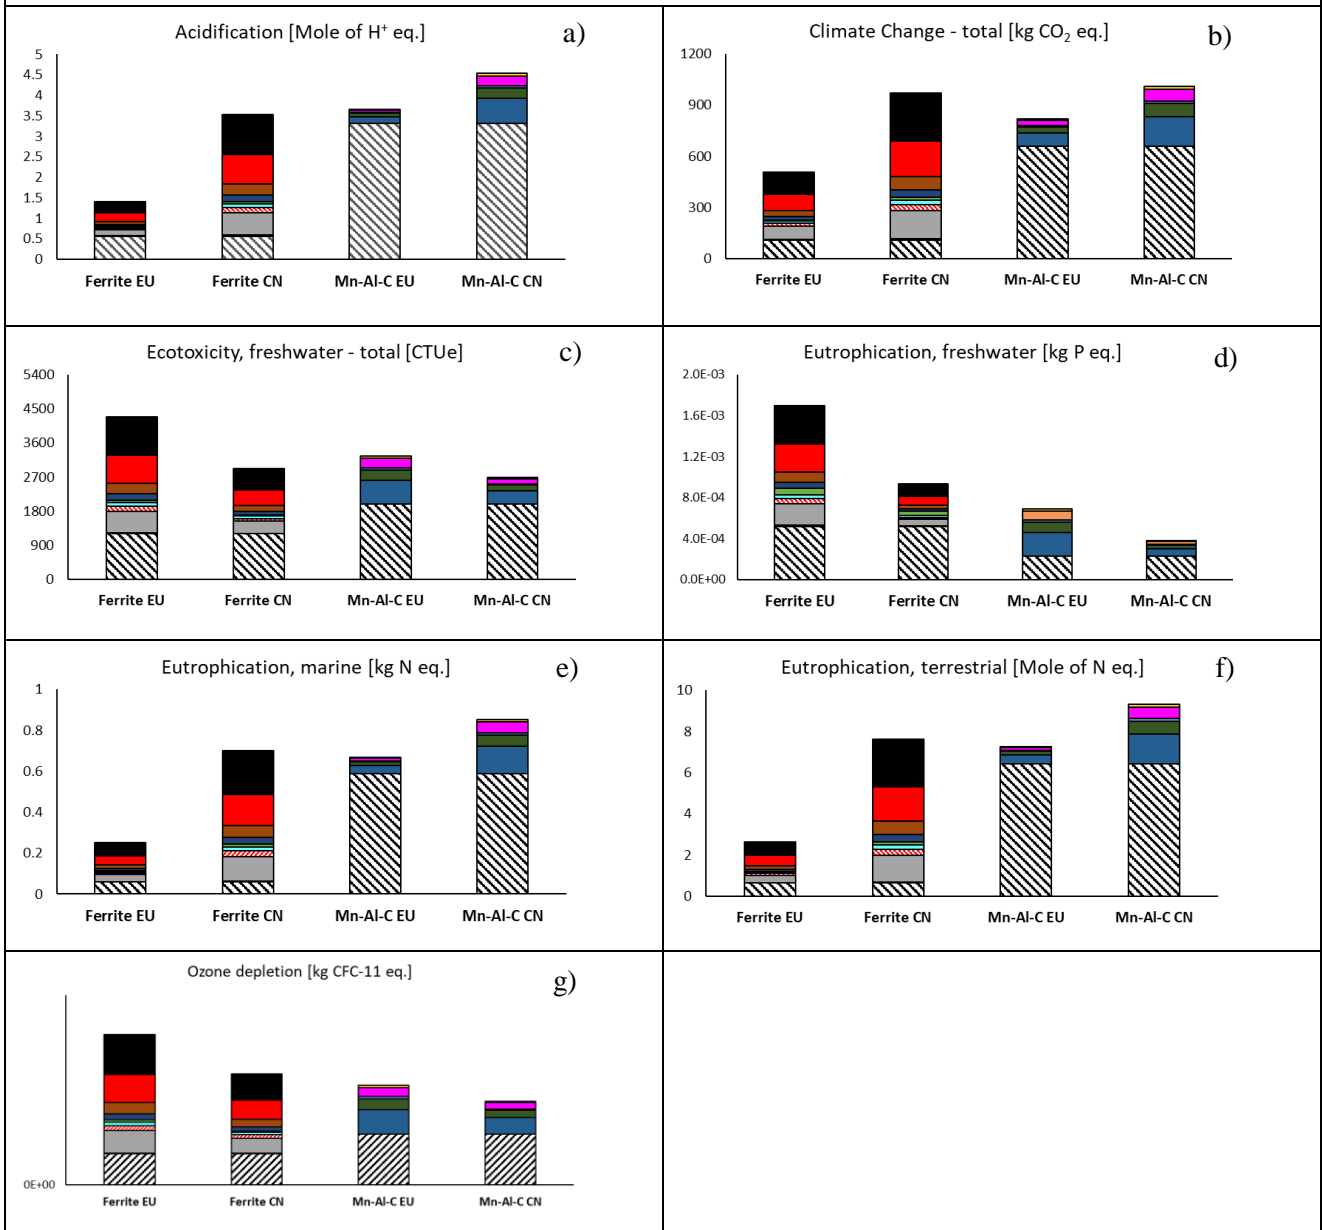

## Resource depletion

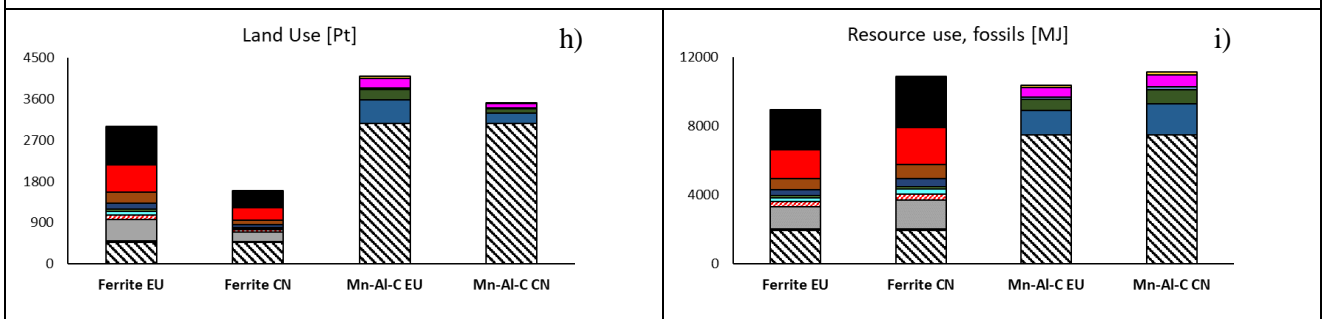

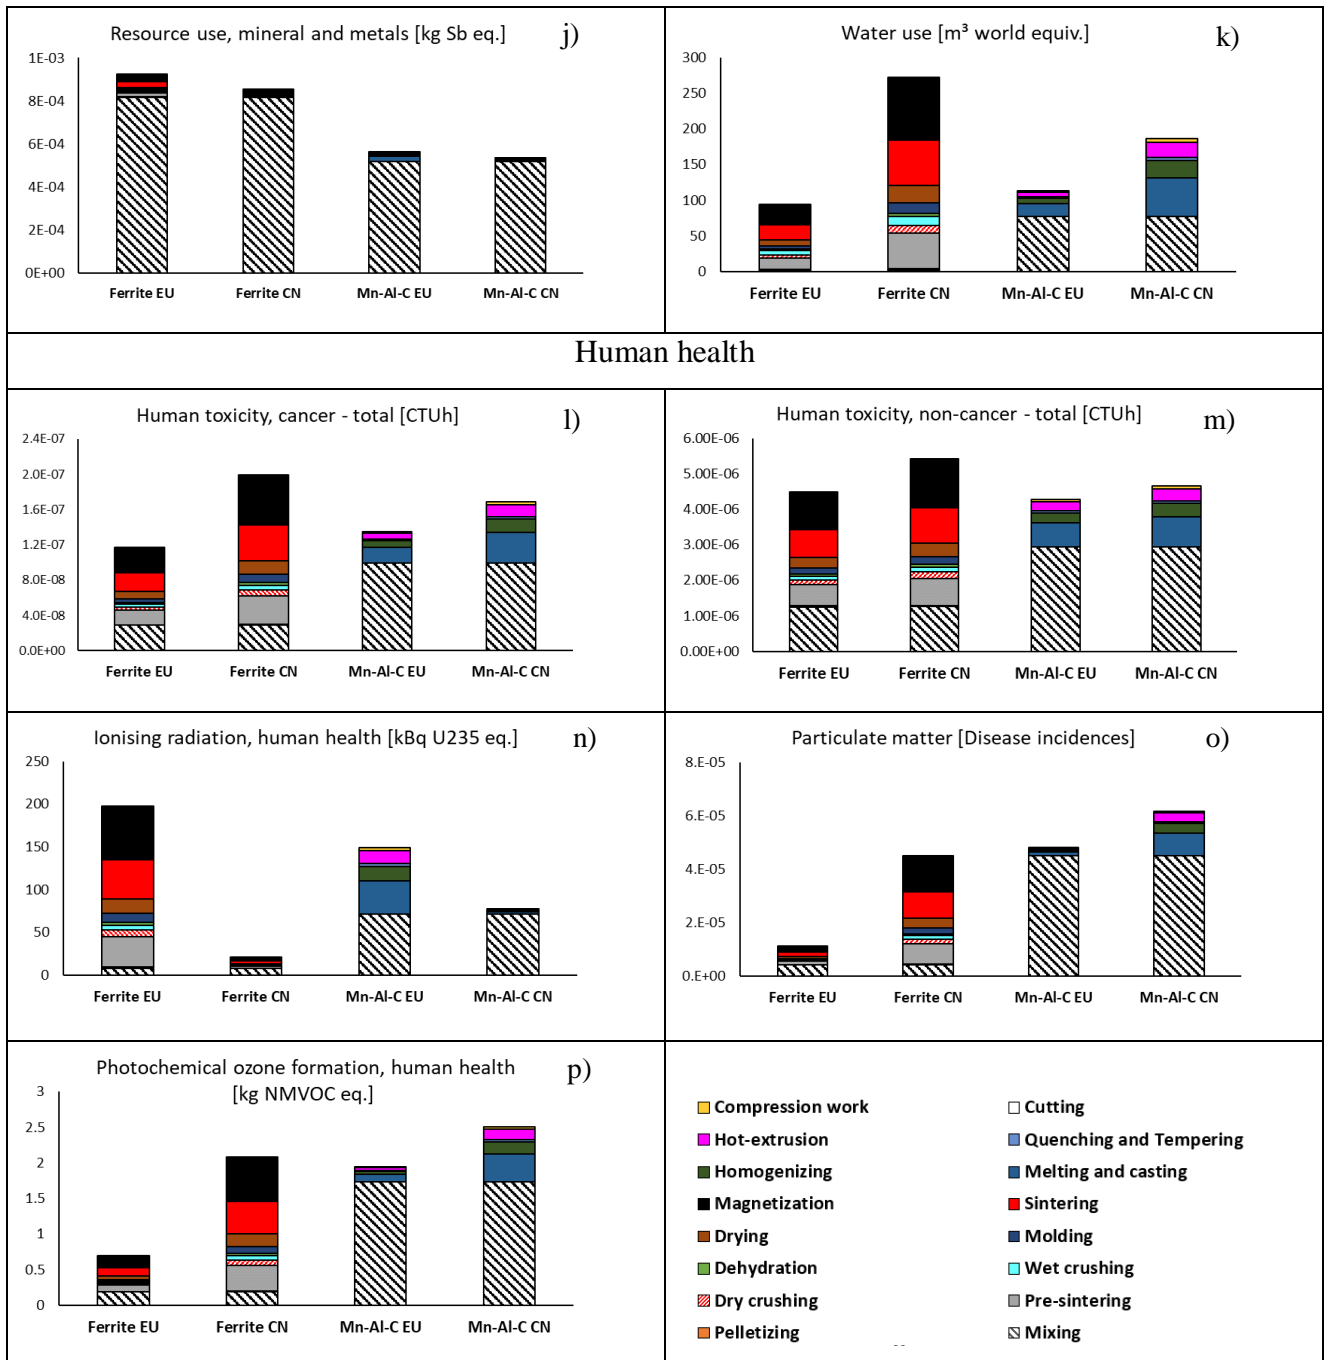

Figure S1 Assessment of environmental impacts in the categories of a) acidification, b) climate change, c) ecotoxicity, freshwater, d) eutrophication, freshwater, e) eutrophication marine, f) eutrophication terrestrial, g) ozone depletion, h) land use, i) resource use, fossils, j) resource use, mineral and metals, k) water use, l) human toxicity, cancer, m) human toxicity, non-cancer, n) ionizing radiation, human health, o) particulate matter, p) photochemical ozone formation, comparison between production processes of ferrite and Mn-Al-C magnets. Energy is supplied by Chinese grid mix (functional unit: 100 kg of magnets).

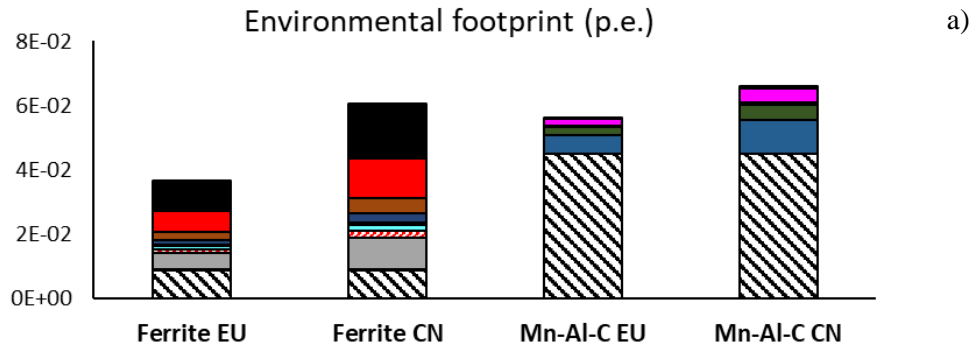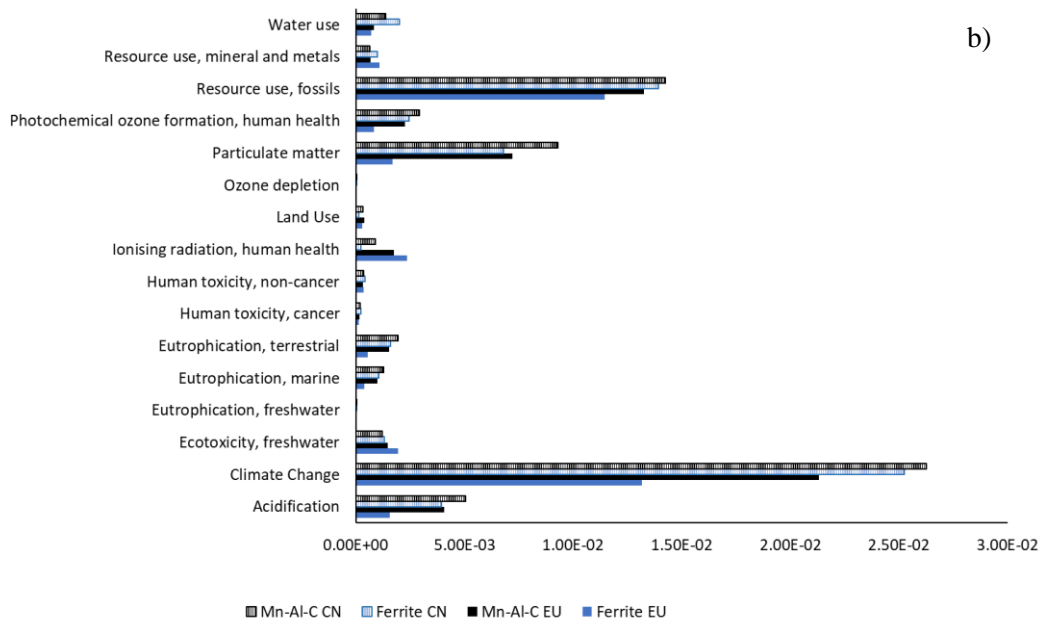

Figure S2: Assessment of environmental footprint: a) comparison between production processes of ferrite and Mn-Al-C magnets b) contribution of impact categories. Energy is supplied by Chinese grid mix (functional unit: 100 kg of magnets)

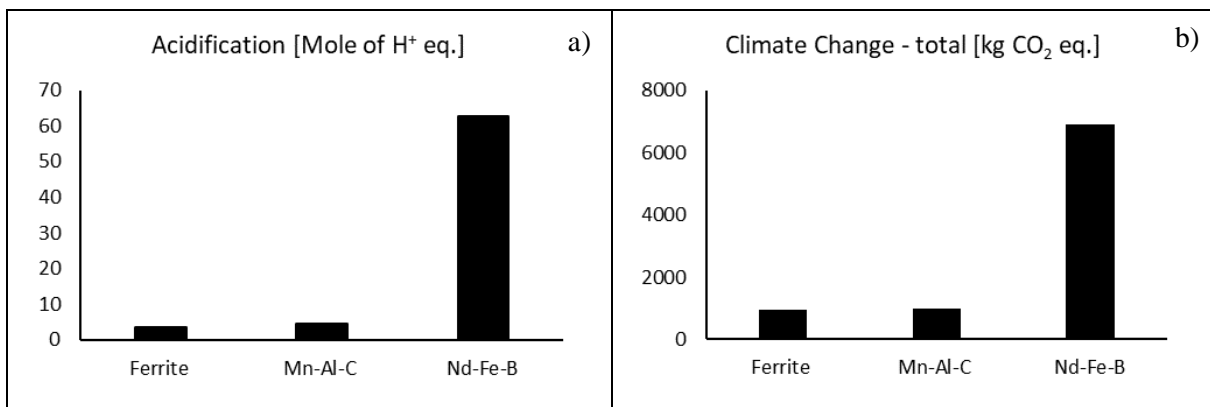

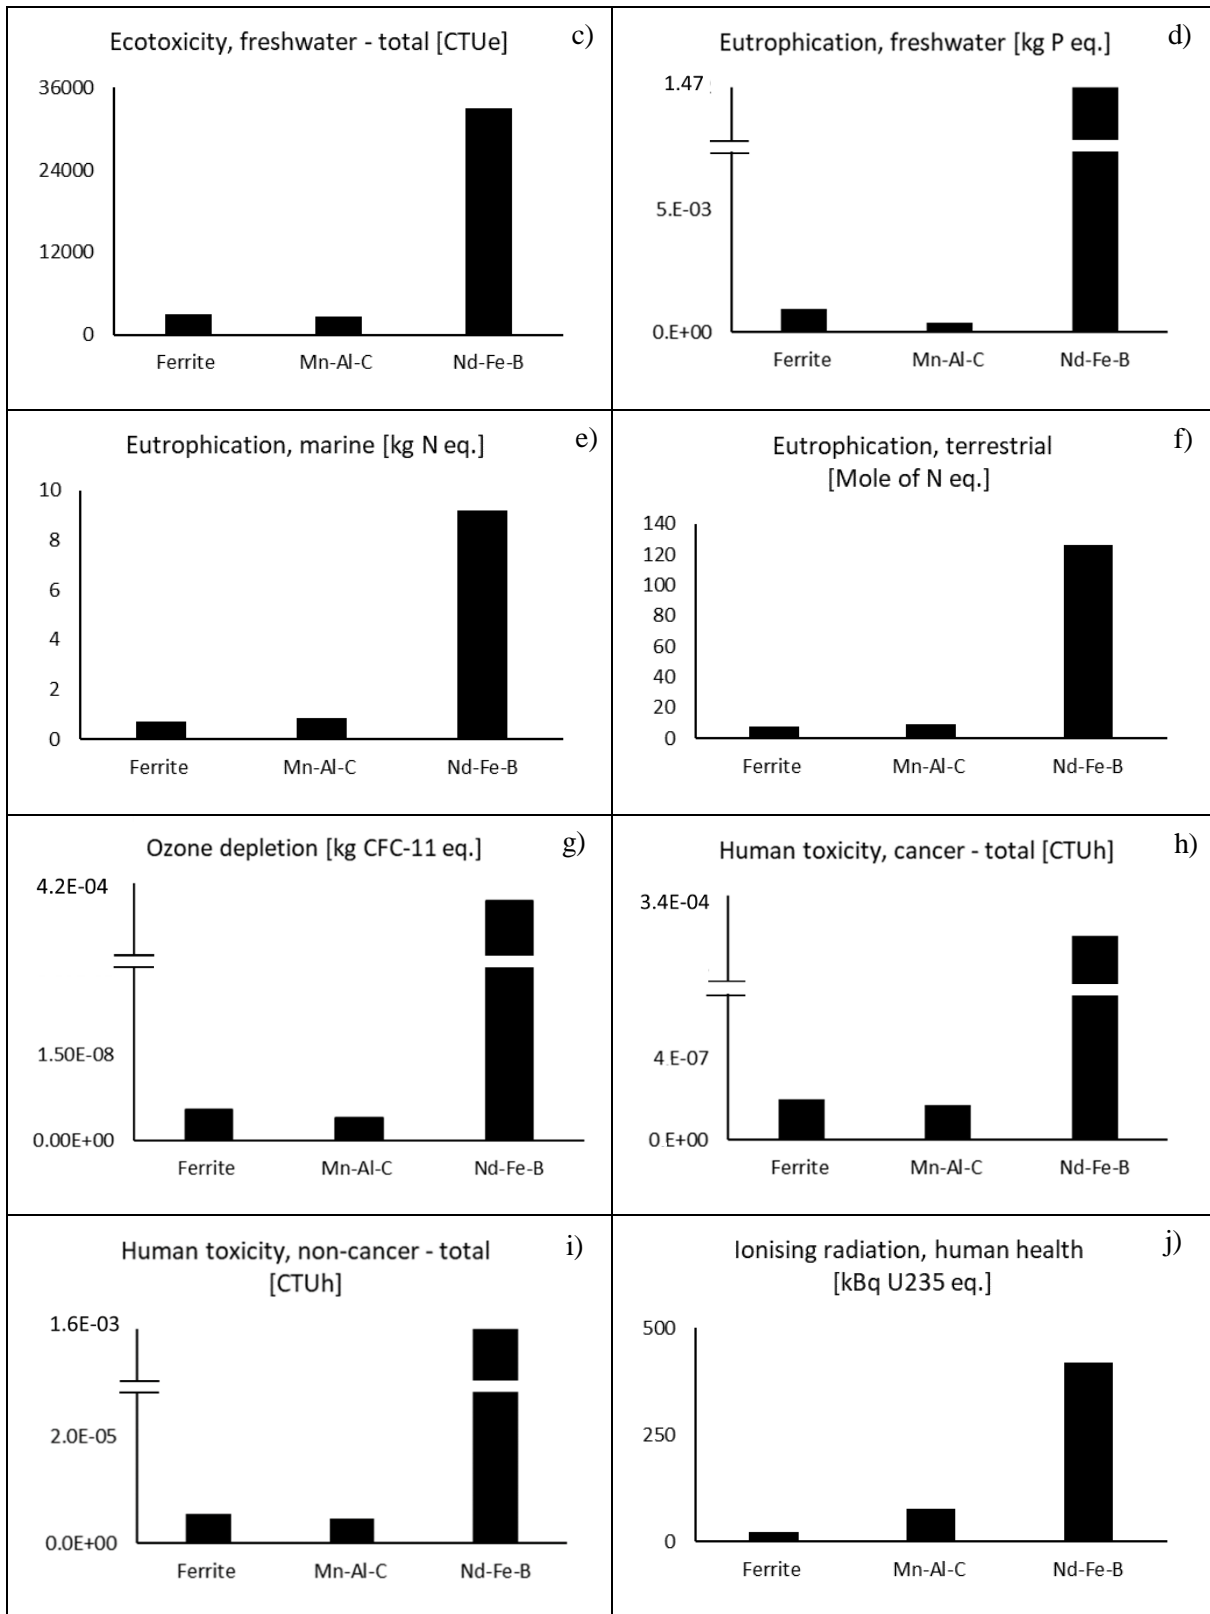

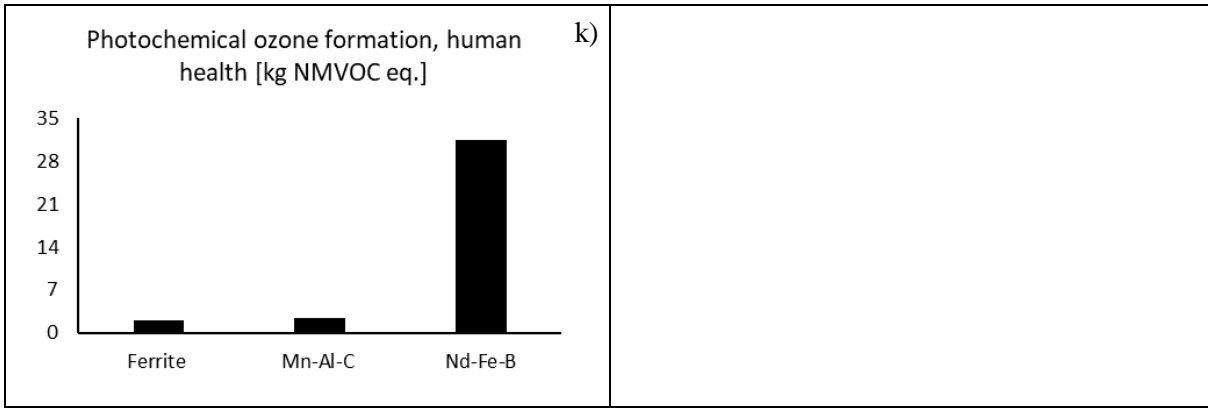

Figure S3: Environmental impact assessment of manufacturing processes in the categories of a) acidification, b) climate change, c) ecotoxicity, freshwater, d) eutrophication, freshwater, e) eutrophication marine, f) eutrophication terrestrial, g) ozone depletion, h) human toxicity, cancer, i) human toxicity, non-cancer, j) ionizing radiation, human health, k) photochemical ozone formation, comparison among sintered ferrite, Mn-Al-C and Nd-Fe-B magnets. Energy is supplied by Chinese grid mix.



## References

- (1) Amixon mixing technology. *Conical mixer Type AM*. <https://www.amixon.com/en/products/conical-mixer> (accessed 2023-07-14).
- (2) Telang. *Activated alumina ceramic ball pelletizer machine*. <https://www.telangmachine.com/> (accessed 2023-07-14).
- (3) Agico Cement. *Electric heating rotary kiln*. <https://www.rotarykilnfactory.com/electric-heating-rotary-kiln/> (accessed 2023-07-14).
- (4) Tencan. *380V Rolling Ball Mill Ultra Fine Powder Milling with Alumina Ceramic Liner Cylinder*. <https://www.laboratoryballmill.com/sale-10839488-380v-rolling-ball-mill-ultra-fine-powder-milling-with-alumina-ceramic-liner-cylinder.html> (accessed 2023-07-14).
- (5) Alibaba. *Solid-Liquid Semi-Automatic separator Machine Centrifuge*. [https://www.alibaba.com/product-detail/Solid-Liquid-Semi-Automatic-separator-Machine\\_62185577074.html](https://www.alibaba.com/product-detail/Solid-Liquid-Semi-Automatic-separator-Machine_62185577074.html) (accessed 2023-07-14).
- (6) Dexing Magnet. *DXBT-100 Magnetic Field Injection Machine*. <https://www.magnetomachinery.com/magnet-field-injection-machine-2.htm> (accessed 2023-07-14).
- (7) Labocon. *Oven*. <https://www.labocon.com/catalog/oven.pdf> (accessed 2023-07-14).
- (8) Nordelöf, A.; Grunditz, E.; Lundmark, S.; Tillman, A. M.; Alatalo, M.; Thiringer, T. Life Cycle Assessment of Permanent Magnet Electric Traction Motors. *Transp. Res. Part D Transp. Environ.* **2019**, *67*, 263–274, DOI 10.1016/j.trd.2018.11.004.
- (9) Sprecher, B.; Xiao, Y.; Walton, A.; Speight, J.; Harris, R.; Kleijn, R.; Visser, G.; Kramer, G. J. Life Cycle Inventory of the Production of Rare Earths and the Subsequent Production of NdFeB Rare Earth Permanent Magnets. *Environ. Sci. Technol.* **2014**, *48* (7), 3951–3958, DOI 10.1021/es404596q.
- (10) Induction, 5M. *Induction melting/heating/holding*. <http://5mtr.com/wp-content/uploads/2020/06/5M-Catalogue.pdf> (accessed 2023-07-14).
- (11) Nabartherm. *Thermal process technology*. <https://nabertherm.com/sites/default/files/2021->

01/thermalprocesstechnology\_english.pdf (accessed 2023-07-14).

- (12) China extrusion press. *Extrusion press ABE-630*. <http://www.china-extrusion-press.com/extrusion-press/Extrusion-Press-ABE-630.htm> (accessed 2023-07-14).
- (13) Alibaba. *Automatic mechanical powder compacting press machine*. [https://cnhailichina.en.alibaba.com/product/62145089149-215450835/3\\_ton\\_press\\_machine\\_HPP\\_30F\\_automatic\\_Mechanical\\_powder\\_compacting\\_press\\_machine.html](https://cnhailichina.en.alibaba.com/product/62145089149-215450835/3_ton_press_machine_HPP_30F_automatic_Mechanical_powder_compacting_press_machine.html) (accessed 2023-07-14).
